RESEARCH ARTICLE

# Molecular Characteristics of Disease-Causing and Commensal *Staphylococcus lugdunensis* Isolates from 2003 to 2013 at a Tertiary Hospital in Taiwan

Chun-Fu Yeh<sup>1,2</sup>, Tsui-Ping Liu<sup>3</sup>, Chun-Wen Cheng<sup>1</sup>, Shih-Cheng Chang<sup>3,4</sup>, Ming-Hsun Lee<sup>1</sup>, Jang-Jih Lu<sup>3,4\*</sup>

**1** Division of Infectious Diseases, Department of Internal Medicine, Chang Gung Memorial Hospital at Linkou, Chang Gung University College of Medicine, Taoyuan, Taiwan, **2** Graduate Institute of Clinical Medical Sciences, College of Medicine, Chang Gung University, Taoyuan, Taiwan, **3** Department of Laboratory Medicine, Chang Gung Memorial Hospital at Linkou, Taoyuan, Taiwan, **4** Department of Medical Biotechnology and Laboratory Science, College of Medicine, Chang Gung University, Taoyuan, Taiwan

\* [janglu45@gmail.com](mailto:janglu45@gmail.com)

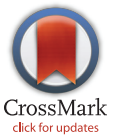

**OPEN ACCESS**

**Citation:** Yeh C-F, Liu T-P, Cheng C-W, Chang S-C, Lee M-H, Lu J-J (2015) Molecular Characteristics of Disease-Causing and Commensal *Staphylococcus lugdunensis* Isolates from 2003 to 2013 at a Tertiary Hospital in Taiwan. PLoS ONE 10(8): e0134859. doi:10.1371/journal.pone.0134859

**Editor:** Jose Melo-Cristino, Faculdade de Medicina de Lisboa, PORTUGAL

**Received:** April 23, 2015

**Accepted:** July 14, 2015

**Published:** August 6, 2015

**Copyright:** © 2015 Yeh et al. This is an open access article distributed under the terms of the [Creative Commons Attribution License](https://creativecommons.org/licenses/by/4.0/), which permits unrestricted use, distribution, and reproduction in any medium, provided the original author and source are credited.

**Data Availability Statement:** All relevant data are within the paper and its Supporting Information files.

**Funding:** This work was supported by grants from Chang Gung Memorial Hospital (CMRPG3D1771) (CF, Yeh) and the National Science Council of Republic of China (Taiwan) (NSC-101-2320-B-182A-002-MY3) (JJ Lu), Taiwan. The funders had no role in study design, data collection and analysis, decision to publish, or preparation of the manuscript

**Competing Interests:** The authors have declared that no competing interests exist.

## Abstract

### Objectives

*Staphylococcus lugdunensis* can cause community- and healthcare-associated infections. This study investigated the molecular characteristics of *S. lugdunensis* isolates collected at our hospital and compared the characteristics of the infectious and commensal isolates.

### Methods

We collected the *S. lugdunensis* isolates between 2003 and 2013. The antimicrobial resistance test, SCCmec typing, accessory gene regulator (*agr*) typing, pulsed-field gel electrophoresis (PFGE), and  $\delta$ -like hemolysin activity were performed.

### Results

In total, 118 *S. lugdunensis* isolates were collected, of which 67 (56.8%) were classified into the infection group and 51 (43.2%) into the commensal group. The oxacillin resistance rate was 36.4%. The most common SCCmec types were SCCmec types V (51.4%) and II (32.6%). In total, 34 pulsotypes were identified. The PFGE typing revealed five clones (pulsotypes A, J, M, N, and P) at our hospital. Pulsotypes A and N caused the spread of high oxacillin resistance. In total, 10.2% (12 of 118) of the isolates lacked  $\delta$ -like hemolysin activity. Compared with the infection group, the commensal group showed a higher percentage of multiple drug resistance and carried a higher percentage of SCCmec type II (11 of 22, 50% and 3 of 21, 14.3%) and a lower percentage of SCCmec type V (8 of 22, 36.4% and 14 of 21, 66.7%). The commensal group (27 PFGE types) showed higher genetic diversity than did the infection group (20 PFGE types). No difference was observed in the distribution

of the five main pulsotypes, *agr* typing, and the presence of  $\delta$ -like hemolysin activity between the two groups.

## Conclusions

Five main clones were identified at our hospital. The commensal group showed higher genetic diversity, had a higher percentage of multidrug resistance, and carried a higher percentage of SCCmec type II and a lower percentage of SCCmec type V than did the infection group.

## Introduction

*Staphylococcus lugdunensis*, belonging to the group of coagulase-negative staphylococci (CoNS), was first reported by Freney et al. in 1988 [1]. Although the incidence rate of *S. lugdunensis* infection was low [2, 3], increasing numbers of patients with *S. lugdunensis* infective endocarditis have been reported in recent 20 years [4, 5]. It has also emerged as a pathogen that causes various community- and healthcare-associated infections, such as those of the bloodstream, bones and joints, skin and soft tissues, and the central nervous system [6, 7].

Like other CoNS species, *S. lugdunensis* is a commensal skin flora of humans [8]. It can be transmitted between hospitalized patients and hospital environments and causes invasive infections in patients with impaired skin integrity and indwelling catheters and foreign devices [9, 10]. The organism is generally assumed to colonize the human skin and then cause invasive infection. However, little is known about the molecular epidemiology of commensal isolates.

Compared with the high prevalence of oxacillin resistance among *Staphylococcus aureus* and other CoNS in hospital environments, that of *S. lugdunensis* has been reported to be low [3, 6, 9, 11, 12]. However, in our recent study, a high rate of oxacillin resistance was observed in patients with invasive *S. lugdunensis* infection, with a 20.8% resistance rate [7]. In addition, erythromycin (25%) and clindamycin (18.8%) resistance was observed. The most common SCCmec type was type V, and all these isolates were accounted for healthcare-associated infections [7]. *S. lugdunensis* isolates carrying SCCmec type V were also reported in central Taiwan [13].

In addition to SCCmec typing, the accessory gene regulator (*agr*) locus also serves as a crucial molecular marker of staphylococci. According to polymorphisms, the *agr* gene can be divided into four types in *S. aureus* [14], and two types in *S. lugdunensis* [15]. Many virulence factors of staphylococci are regulated by the *agr* locus. Extensive research has been conducted on the *agr* locus of *S. aureus*, and different *agr* types have been associated with different virulence profiles and human diseases [16]; however, the association between *agr* typing and *S. lugdunensis* infection is unclear. Like *S. aureus* and *S. epidermidis*, *S. lugdunensis* can produce *S. lugdunensis* synergistic hemolysin, which belongs to the family of phenol-soluble modulins (PSM) peptides [17]. This hemolysin is controlled by the *agr* locus. This  $\delta$ -like hemolysin produced serves as a surrogate marker of the *agr* function in staphylococci [18].

Although the molecular characteristics of pathogenic isolates have been studied [19, 20], little is known about the characteristics of commensal populations. Understanding the molecular characteristics of infectious and commensal isolates can facilitate identifying the cause of the high resistance rate, control the spread of resistant strains, and establish a background database for further study on pathogenic isolates. The aim of this study was to investigate the molecular characteristics of the *S. lugdunensis* isolates collected at our hospital over 10 years and to compare the characteristics of the isolates causing infection and those considered contaminants or

commensals by using various methods, including pulsed-field gel electrophoresis (PFGE) typing, SCCmec typing, *agr* typing, and hemolytic activity analysis.

## Materials and Methods

### Clinical setting

This study was conducted at Chang Gung Memorial Hospital (CGMH) in Taoyuan, Taiwan. The hospital is a 3700-bed university-affiliated hospital and tertiary referral medical center in northern Taiwan. This study was approved by the Chang Gung Medical Foundation Institutional Research Board (approval number: 103-3231B). All *S. lugdunensis* isolates were obtained from blood or sterile body fluid cultures in our clinical microbiology laboratory between May 2003 and 2013. Clinical data, including the patient age, sex, types of samples, and infectious foci, were retrospectively collected using chart review and analyzed anonymously.

### Case definition

Clinically significant bacteremia was defined as occurring in patients when two consecutive positive blood cultures were obtained for *S. lugdunensis*. Patients with a single positive blood culture were considered to have clinically significant bacteremia if they experienced one or more of the following: prolonged fever, hypotension, leukocytosis or neutropenia with a left-shifted differential, or disseminated intravascular coagulopathy combined with risk factors for infections caused by skin flora, including long-term intravascular catheterization, peritoneal dialysis or hemodialysis, or extensive postsurgical infections with CoNS [21, 22]; otherwise, positive results were attributed to contamination of the blood culture, and the isolate was classified as commensal.

Healthcare-associated infections were defined as occurring in patients with the following: (1) *S. lugdunensis* infection identified after 48 hours of admission to the hospital; (2) a history of hospitalization, surgery, dialysis, or residence in a long-term care facility within 1 year of the positive culture date; or (3) a permanent indwelling catheter or percutaneous medical device present at the time of culture. Cases that had none of the above features were classified as community associated [23].

### Microbiological methods

All *S. lugdunensis* isolates were first identified using Gram staining and biochemical methods (catalase positive, coagulase negative, pyrrolidonyl arylamidase positive, and ornithine decarboxylase positive). Furthermore, all isolates were verified using the polymerase chain reaction (PCR) method described by Noguchi et al. [24] and a Bruker Biotyper (database 2.0) matrix-assisted laser desorption/ionization/time of flight mass spectrometry system [25].

### Antimicrobial susceptibility testing

The minimal inhibitory concentration (MIC) of oxacillin was determined using agar dilution methods. The oxacillin resistance was defined as an MIC of 4 mg/mL or greater, according to the Clinical and Laboratory Standards Institute guidelines [26]. Susceptibility testing of penicillin, clindamycin, erythromycin, and trimethoprim-sulfamethoxazole was performed using the disk diffusion method and interpreted according to the Clinical and Laboratory Standards Institute guidelines [26].

**Table 1. Primers used in polymerase chain reaction amplification and sequencing of the *agr* locus in this study.**

| Primer              | 5'-3' Sequence                                    | Gene             | Purpose              | Size of amplicon (bp) |
|---------------------|---------------------------------------------------|------------------|----------------------|-----------------------|
| SL_agr-F/SL_agr-R   | ATAATGATACCAAGGAGCGTG/ CGAACCTTTAGCTTATCTGTACC    | <i>agrB/agrC</i> | screening            | 1626                  |
| SL_agr-1-F/SL_agr-R | CTGTCATCCTTAGTGTAATTGCTG/ CGAACCTTTAGCTTATCTGTACC | <i>agrC</i>      | <i>agr</i> I typing  | 586                   |
| SL_agr-2-F/SL_agr-R | GCCGGCATAATAGTCCCTTCTG/CGAACCTTTAGCTTATCTGTACC    | <i>agrC</i>      | <i>agr</i> II typing | 771                   |

doi:10.1371/journal.pone.0134859.t001

## SCCmec typing

SCCmec typing of the *S. lugdunensis* isolates was performed using a multiplex PCR for identifying the *ccr* gene complex, the *mec* gene complex, and specific structures in the adjacent regions as described previously when the oxacillin MIC was  $\geq 4$   $\mu\text{g}/\text{mL}$  [27].

## *agr* typing

Two PCR primers (SL\_agr-F and SL\_agr-R) were designed to detect the *agr* genes of the *S. lugdunensis* isolates. We then determined the *agr* type through PCR amplification of the conserved sequences from the *agrC* gene, with two forward primers and one reverse primer (SL\_agr-1-F, SL\_agr-2-F/SL\_agr-R). All primers were designed using a computer-assisted analysis of the genomic DNA sequences from GenBank accession numbers AF173933 and AF346728 and the whole genome sequence data of our two *S. lugdunensis* isolates. All primer sequences are listed in Table 1. The *agr* specificity types were identified on the basis of the expected product sizes (586 bp for *agr* type I and 771 bp for *agr* type II) (Fig 1).

## Pulsed-field gel electrophoresis

Genomic DNAs of the *S. lugdunensis* isolates were digested with SmaI and separated using PFGE as described previously [28]. Lambda ladder DNA was used as a molecular weight marker for PFGE. The PFGE patterns were analyzed, and a dendrogram was constructed using BioNumerics software 6.0 (Applied Maths; Texas, USA). Percent similarities were identified on a dendrogram derived using the unweighted pair group method by using arithmetic averages and based on Dice coefficients. Band position tolerance and optimization were set at 1.25 and 0.5%, respectively [28]. A similarity coefficient of 80% was selected to define closely related strains (clones).

## Hemolytic activity

The  $\delta$ -like hemolysin activity was analyzed by performing a cross-streaking test, perpendicular to RN4220, which produces only  $\beta$ -hemolysin on a Columbia blood agar plate. We used ATCC 25923 *S. aureus* as the *agr*-positive control and the *S. aureus* strain Mu 50 as the *agr*-negative control.

## Statistical analysis

Statistical analyses were performed using the Statistical Package for Social Sciences software Version 18.0 (SPSS Inc.; Chicago, IL, USA). The frequency between the two groups was analyzed by performing a z-test.

## Results

In total, 118 *S. lugdunensis* isolates were collected from 118 patients at CGMH. The mean age of patients was  $56.0 \pm 28.0$  years, and 61 patients (51.7%) were male. All isolates tested were

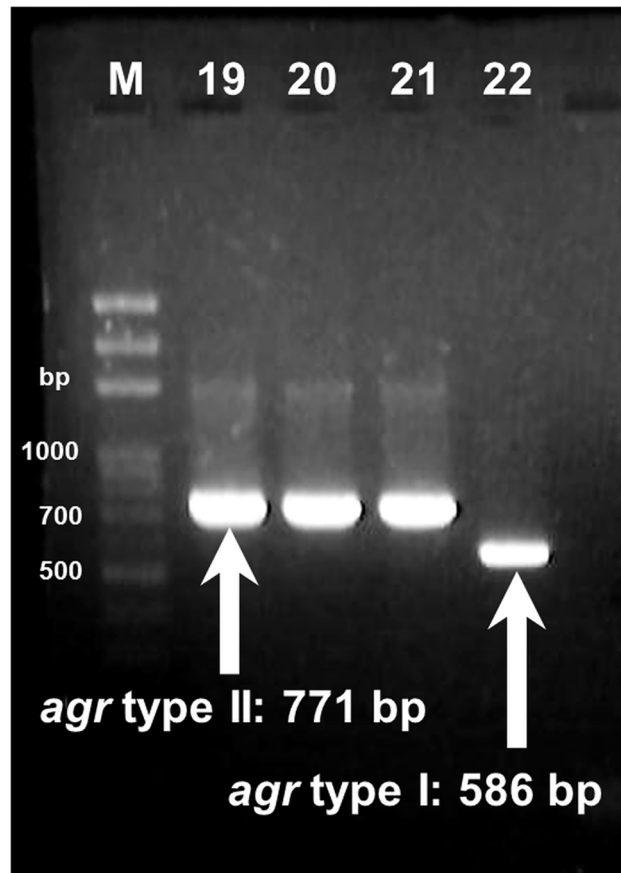

**Fig 1. Multiplex PCR for agr gene typing of *Staphylococcus lugdunensis*.** (Lanes M: marker; 19: *S. lugdunensis* No. 19; 20: *S. lugdunensis* No. 20; 21: *S. lugdunensis* No. 21; 22: *S. lugdunensis* No. 22).

doi:10.1371/journal.pone.0134859.g001

confirmed using matrix-assisted laser desorption ionization/time of flight mass spectrometry and PCR methods. Most of the isolates were collected from the blood culture (n = 105, 89%) (Table 2). In total, 67 isolates (56.8%) caused infections, and 51 isolates (43.2%) were considered contaminants and classified as commensals. Among the isolates involved in infection, 59 (50.0%) caused healthcare-associated infections and 8 (6.8%) caused community-associated infections. The leading causes of infection were primary (n = 29, 24.6%) and catheter-related bacteremia (n = 6, 8.5%). The foci of infection are shown in Table 3.

**Table 2. 118 *Staphylococcus lugdunensis* isolates obtained from various samples.**

| Sample              | Number | Percentage (%) |
|---------------------|--------|----------------|
| Blood               | 105    | 89.0           |
| Ascites             | 6      | 5.1            |
| Body fluid          | 2      | 1.7            |
| Synovial fluid      | 2      | 1.7            |
| Amniotic fluid      | 1      | 0.8            |
| Cerebrospinal fluid | 1      | 0.8            |
| Pleural effusion    | 1      | 0.8            |

doi:10.1371/journal.pone.0134859.t002

**Table 3. Distribution of infection group and commensal group of 118 *Staphylococcus lugdunensis* isolates.**

|                             | Number | Percentage (%) |
|-----------------------------|--------|----------------|
| <b>Infection group</b>      | 67     | 56.8           |
| Primary bacteremia          | 29     | 24.6           |
| Catheter-related            | 10     | 8.5            |
| Arteriovenous graft/fistula | 6      | 5.1            |
| Bone and joints             | 6      | 5.1            |
| Infective endocarditis      | 4      | 3.4            |
| Intra-abdomen               | 4      | 3.4            |
| Skin and soft tissue        | 3      | 2.5            |
| CAPD peritonitis            | 2      | 1.7            |
| Central nervous system      | 1      | 0.8            |
| Genital system              | 1      | 0.8            |
| Lung                        | 1      | 0.8            |
| <b>Commensal group</b>      | 51     | 43.2           |

doi:10.1371/journal.pone.0134859.t003

### Antimicrobial susceptibility

The results regarding antibiotic resistance are shown in Table 4. Analysis of the 118 *S. lugdunensis* isolates revealed that 90 (76.3%) were resistant to penicillin, 43 (36.4%) to oxacillin, 40 (33.9%) to

**Table 4. Antibiotic resistance, distribution of SCCmec types and agr types, and δ-hemolytic activity among infectious and commensal *Staphylococcus lugdunensis* isolates.**

|                              | Total, n = 118, Number (%) | Infection, n = 67, Number (%) | Commensal, n = 51, Number (%) | p value |
|------------------------------|----------------------------|-------------------------------|-------------------------------|---------|
| <b>Antibiotic resistance</b> |                            |                               |                               |         |
| Penicillin-R                 | 90 (76.3)                  | 48 (71.6)                     | 42 (82.4)                     | 0.1773  |
| Oxacillin-R                  | 43 (36.4)                  | 21 (31.3)                     | 22 (43.1)                     | 0.187   |
| SCCmec type II <sup>1</sup>  | 14/43 (32.6)               | 3/21 (14.3)                   | 11/22 (50.0)                  | 0.012   |
| SCCmec type IV               | 2/43 (4.7)                 | 1/21 (4.8)                    | 1/22 (4.5)                    | 0.976   |
| SCCmec type V                | 22/43 (51.2)               | 14/21 (66.7)                  | 8/22 (36.4)                   | 0.047   |
| SCCmec type Vt               | 3/43 (7.0)                 | 2/21 (9.5)                    | 1/22 (4.5)                    | 0.522   |
| SCCmec type NT               | 2/43 (4.7)                 | 1/21 (4.8)                    | 1/22 (4.5)                    |         |
| Clindamycin-R                | 33 (28.0)                  | 13 (19.4)                     | 20 (39.2)                     | 0.017   |
| Erythromycin-R               | 40 (33.9)                  | 17 (25.4)                     | 23 (45.1)                     | 0.025   |
| TMP-SMX-R                    | 2 (1.7)                    | 1 (1.5)                       | 1 (2.0)                       | 0.841   |
| <b>agr type</b>              |                            |                               |                               |         |
| I                            | 53 (44.9)                  | 27 (40.3)                     | 26 (51.0)                     | 0.246   |
| II                           | 65 (55.1)                  | 40 (59.7)                     | 25 (49.0)                     | 0.246   |
| <b>δ-hemolysin activity</b>  |                            |                               |                               |         |
| nonhemolytic                 | 12(10.2)                   | 6 (9.0)                       | 6 (11.8)                      | 0.617   |
| <b>Main pulsotypes</b>       |                            |                               |                               |         |
| A                            | 25 (21.2)                  | 17 (25.4)                     | 8 (15.7)                      | 0.201   |
| J                            | 14 (11.9)                  | 10 (14.9)                     | 4 (7.8)                       | 0.238   |
| M                            | 8 (6.8)                    | 5 (7.5)                       | 3 (5.9)                       | 0.728   |
| N                            | 12 (10.2)                  | 5 (7.5)                       | 7 (13.7)                      | 0.262   |
| P                            | 7 (5.9)                    | 4 (6.0)                       | 3 (5.9)                       | 0.984   |

NT = nontypeable; R = resistant; TMP-SMX = trimethoprim-sulfamethoxazole

<sup>1</sup> The total number of SCCmec types was the number of isolates with oxacillin resistance.

doi:10.1371/journal.pone.0134859.t004



erythromycin, 33 (28.0%) to clindamycin, and only 2 (1.7%) to trimethoprim–sulfamethoxazole. All oxacillin-resistant *S. lugdunensis* isolates emerged after the year 2009 and were distributed as follows: 4 of 9 isolates (44%) in 2009, 12 of 30 (40%) in 2010, 11 of 29 (37.9%) in 2011, 11 of 22 (50%) in 2012, and 5 of 9 (35.7%) in 2013. Among the 43 oxacillin-resistant isolates, 18 (41.9%) were also resistant to clindamycin and erythromycin and one (0.8%) was also resistant to erythromycin and trimethoprim–sulfamethoxazole. Compared with the infectious isolates, the commensal isolates showed a higher percentage of multiple drug resistance ( $p < 0.05$ ). No difference was observed in the penicillin and oxacillin resistance rates.

### SCCmec typing

The SCCmec typing results are summarized in [Table 4](#). Among the 43 oxacillin-resistant isolates, SCCmec could be classified in 41 isolates, and 2 isolates were untypeable. The most common SCCmec type was type V (22 of 43, 51.2%), followed by type II (14 of 43, 32.6%). A higher frequency of SCCmec type V (66.7%, 14 of 21) than that of SCCmec type II (14.2%, 3 of 21) was observed in patients with infections ( $n = 21$ ) caused by oxacillin-resistant *S. lugdunensis*. All infectious oxacillin-resistant isolates were isolated from patients with healthcare-associated infections. Among the 22 commensal isolates, SCCmec type II (11 of 22, 50%) was the most frequently detected, followed by SCCmec type V (8 of 22, 36.4%). The difference in the distribution of SCCmec types was statistically significant between the infection and commensal groups ( $p < 0.05$ ) ([Table 4](#)). All *S. lugdunensis* isolates with SCCmec type II were resistant to oxacillin, erythromycin, and clindamycin. Most SCCmec type V isolates were resistant to oxacillin and sensitive to clindamycin and erythromycin (21 of 22, 95.2%).

### agr typing

The *agr* gene in most isolates could be divided into two *agr* types according to the PCR product size. Large PCR products were observed in our two isolates (SL32 and SL44). Further analysis of the PCR products using sequencing suggested an insertion sequence at the *agr* locus. The sequencing results showed that SL32 possessed *agr* type I, and SL44 possessed type II. In total, 53 isolates (44.9%) possessed *agr* type I, and 65 (55.1%) possessed *agr* type II. The distribution of the infectious isolates was as follows: 27 isolates (40.3%) carried type I, and 40 isolates (59.7%) carried type II. The distribution of the commensal isolates was as follows: 26 isolates (51.0%) possessed type I, and 25 isolates (49.0%) possessed type II. No statistical difference was observed between the infection and commensal groups ([Table 4](#)). In addition, most isolates with SCCmec type II carried *agr* type I (13 of 14, 92.9%), and all isolates with SCCmec type V carried *agr* type II (22 of 22, 100.0%) ( $p < 0.05$ ). The results showed a strong relationship between *agr* and SCCmec types in oxacillin-resistant isolates.

### Hemolytic activity

Upon screening for  $\delta$ -like hemolysin activity, we found that 12 (10.2%) of the 118 isolates lacked synergistic hemolytic activity; of these isolates, six belonged to the infection group, and six belonged to the commensal group. The percentage of nonhemolytic isolates was similar between the infection and commensal groups ([Table 4](#)). Among the nonhemolytic isolates, three isolates (3 of 53, 5.7%) possessed *agr* type I, and nine isolates (9 of 65, 13.8%) possessed *agr* type II. The percentage of nonhemolytic isolates with *agr* types I and II was similar ( $p = 0.144$ ).

## Pulsed-field gel electrophoresis typing

The dendrogram is shown in Fig 2. The 118 *S. lugdunensis* isolates collected at our hospital comprised a total of 34 PFGE types; however, more than half of the isolates (55.9%) belonged to five main pulsotypes (A, J, M, N, and P). Nineteen pulsotypes were represented by a single isolate each. Overall, pulsotype A (25/118, 21.2%) was the predominant pulsotype, followed by pulsotype J (14/118, 11.9%), pulsotype N (12/118, 10.2%), pulsotype M (8/118, 6.8%), and pulsotype P (7/118, 5.9%). The five pulsotypes differed in their resistant patterns. More than half of the isolates ( $n = 21$ , 84.0%) of pulsotype A were resistant only to oxacillin and carried SCCmec type V–*agr* type II (17/25, 68.0%), while most isolates ( $n = 11$ , 91.7%) belonging to pulsotype N showed multidrug resistance and carried SCCmec type II–*agr* type I (9/12, 75.0%) (Table 5). Compared with isolates of pulsotypes A and N, those belonging to pulsotypes J, M, and P were mostly oxacillin sensitive (25/29, 86.2%). Compared with the infection group (20 PFGE types), the commensal group (27 PFGE types) showed higher genetic diversity ( $p = 0.011$ ). No difference was observed in the distribution of the five main pulsotypes between the infection and commensal groups (Table 4). The details of the characteristics of the five pulsotypes are shown in Table 5 and S1 Table.

## Discussion

In this study, we analyzed general molecular characteristics and compared the molecular characteristics of the *S. lugdunensis* isolates at our hospital in the infection and commensal groups. The two most common SCCmec types carried by oxacillin-resistant *S. lugdunensis* at our hospital were types II and V. Both *agr* types I and II were equally distributed in the studied *S. lugdunensis* isolates. In addition, we identified five main clones at our hospital. Pulsotypes A and N were responsible for high oxacillin resistance. A comparison of the characteristics of the infectious *S. lugdunensis* and commensal isolates revealed that the commensal group had a higher percentage of multiple drug resistance than did the infection group. The commensal group also showed higher genetic diversity than did the infection group. The isolates belonging to the commensal group carried SCCmec type II more frequently and SCCmec type V less frequently compared with those belonging to the infection group. No difference was observed in the distribution of *agr* types and in the presence of hemolysin activity between the two groups.

SCCmec typing is a crucial epidemiological technique for analyzing oxacillin-resistant staphylococci. Studies showed that healthcare-associated methicillin-resistant *S. aureus* (MRSA) infections were caused by strains carrying SCCmec types I, II, and III but rarely by those carrying types IV and V [29]. At our hospital, the most common oxacillin-resistant *S. lugdunensis* isolates causing healthcare-associated infections carried SCCmec type V, followed by SCCmec type II. However, among the isolates considered commensals, the isolates carrying SCCmec type II were more common than those carrying SCCmec type V. Keito et al. in 2011 reporting a gene named *psm-mec*, which was present in the SCCmec type II cassette, regulated the virulence of *S. aureus*. The *psm-mec* encoded RNA and peptides could promote biofilm formation and reduced the dissemination ability of staphylococci [30, 31]. The SCCmec type V isolates, which did not carry *psm-mec*, showed higher colony spreading ability. This may partially explain our finding that the isolates carrying SCCmec type II caused fewer infection episodes than did those carrying SCCmec type V. Many studies on the epidemiology of MRSA infection have revealed that the community-associated MRSA SCCmec types have infiltrated healthcare settings [32]. More recent studies have shown the presence of MRSA strains carrying SCCmec types IV and V in healthcare-associated settings in many countries [33–35]. An increase in the number of MRSA strains carrying SCCmec type V was not only associated with skin and soft tissue infections but also with invasive infections. Our study showed that both



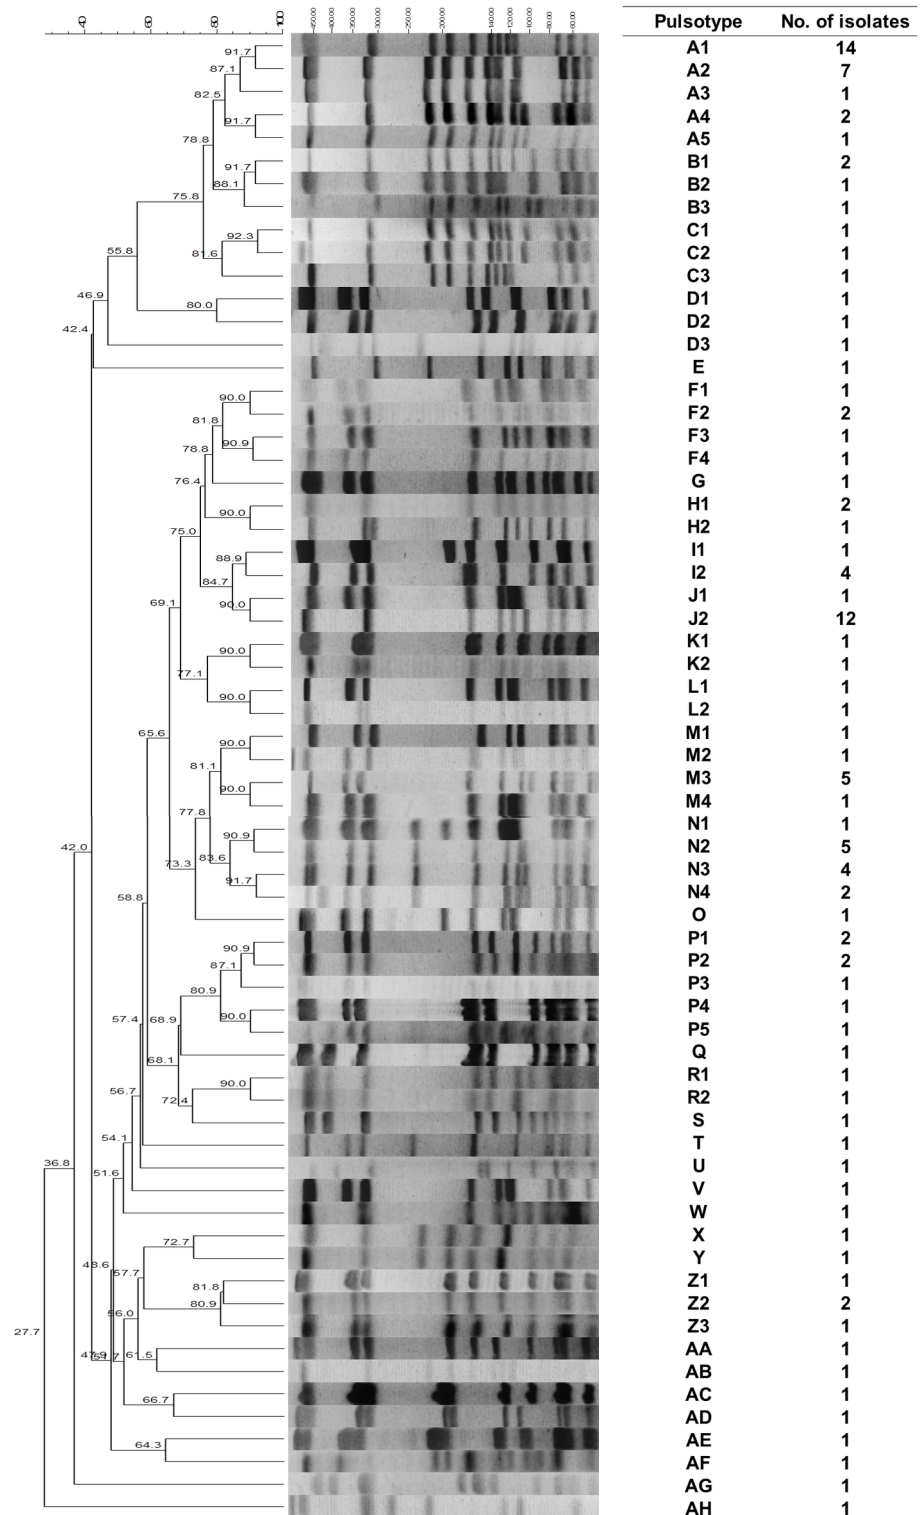

**Fig 2. Dendrogram of pulsed field gel electrophoresis of 118 *Staphylococcus lugdunensis* isolates.**

doi:10.1371/journal.pone.0134859.g002

**Table 5. Summary of the pulsed-field gel electrophoresis results, antimicrobial resistance, and SCCmec and agr typing for *Staphylococcus lugdunensis*.**

| PFGE type | Number (%) of isolates | Infection, n                    | Oxacillin resistant, n | Resistance profile <sup>1</sup> , n | SCCmec-agr, n                                                 |
|-----------|------------------------|---------------------------------|------------------------|-------------------------------------|---------------------------------------------------------------|
| A         | 25 (21.2)              | HAI, 17; Commensals, 8          | 21                     | O, 19; O-C-E, 2                     | SCCmec V-agr II, 17; SCCmec Vt-agr II, 3; SCCmec IV-agr II, 1 |
| J         | 14 (11.9)              | HAI, 10; Commensals, 4          | 1                      | O-C-E, 1; C-E, 4                    | SCCmec II-agr I, 1                                            |
| M         | 8 (6.8)                | HAI, 5; Commensals, 3           | 2                      | O-C-E, 2; C-E, 1                    | SCCmec II-agr I, 2                                            |
| N         | 12 (10.2)              | HAI, 4; CAI, 1; Commensals, 7   | 11                     | O-C-E, 11                           | SCCmec II-agr I, 9; SCCmec II-agr II, 1; SCCmec NT-agr I, 1   |
| P         | 7 (5.9)                | HAI, 3; CAI, 1; Commensals, 3   | 1                      | O-E-SXT, 1; C-E, 2; E, 2; E-SXT, 1  | SCCmec IV-agr I, 1                                            |
| other     | 52 (44.1)              | HAI, 20; CAI, 6; Commensals, 26 | 7                      | O, 5; O-C-E, 2; C-E, 8; E, 3        | SCCmec V-agr II, 5; SCCmec II-agr I, 1; SCCmec NT-agr I, 1    |

CAI = community-associated infection; HAI = healthcare-associated infection; NT = nontypeable; PFGE = pulsed-field gel electrophoresis

<sup>1</sup>C-E, clindamycin and erythromycin resistance; E, erythromycin resistance; E-SXT, erythromycin and trimethoprim-sulfamethoxazole resistance; O, oxacillin resistance; O-C-E, oxacillin, clindamycin, and erythromycin resistance; O-E-SXT, oxacillin, erythromycin, and trimethoprim-sulfamethoxazole resistance

doi:10.1371/journal.pone.0134859.t005

SCCmec types II and V are the major SCCmec types in healthcare settings. Recently, *S. lugdunensis* carrying SCCmec type V was identified in central Taiwan [13]. Our data also suggested the emergence of SCCmec type V in healthcare settings for *S. lugdunensis*. However, the number of cases with community-associated infections was small in our study, and further analysis of community-associated SCCmec types in *S. lugdunensis* is required.

In the present study, the oxacillin resistance rate was 36.4%, which was higher than that reported in other studies [9, 12]. All oxacillin-resistant isolates were found after 2009. All infection episodes caused by oxacillin-resistant isolates were healthcare-associated infections. No community-associated infection with oxacillin-resistant *S. lugdunensis* was found. The findings indicate that the emergence of high oxacillin resistance within *S. lugdunensis* was due to high antibiotic selection pressure at the hospital. Moreover, according to the PFGE data, 35 (81.3%) oxacillin-resistant isolates belonged to two clones (pulsotypes A and N). These findings suggest that the increasing resistance rate can be largely attributed to clonal spread at our hospital and not to the horizontal transfer of the SCCmec cassette between the *S. lugdunensis* isolates. These groups of isolates could not only colonize the skin but also caused invasive infections. While these bacterial clones did not cause outbreaks, they can still cause invasive infections, especially in patients with indwelling catheters. Although we did not screen for bacteria isolated from the hospital environment and medical devices, we believe that infection control precautions are required to eliminate the bacteria.

No difference was observed in the distribution of agr types between the infection and commensal groups. The agr system plays a major role in staphylococcal pathogenesis. According to a study conducted by Jarraud et al., different agr types are associated with different patterns of *S. aureus* diseases [16]. For example, agr type IV is associated with generalized exfoliative syndromes. Endocarditis strains mainly possess agr types I and II. However, in our study, we did not find any relationship between agr types and the patterns of *S. lugdunensis* disease. One possible reason is that our bacterial isolates were mostly from patients with bacteremia. No isolates were obtained from wound infections, and the number of isolates from other clinical samples was small. However, the agr types were highly correlated with the SCCmec types, probably because these isolates belonged to the same clones.

Most of our isolates were positive for  $\delta$ -like hemolysin activity. Only 10% of the isolates were nonhemolytic. This result was consistent with that of a previous report [36]. A study revealed that the synergistic hemolytic activity of *S. lugdunensis* is distinct from that of *S. aureus* [37]. Unlike the  $\delta$ -like hemolysin activity of *S. aureus*, which is controlled by the *agr-hld* system, that of *S. lugdunensis* is encoded by the *slush* locus, which belongs to the PSM family and is controlled by the *agr* locus. In animal models, the *agr*-defective mutants are attenuated for virulence [38]. However, in recent studies, *agr*-defective *S. aureus* was associated with persistent bacteremia and increased mortality [39, 40]. In our study, no difference was observed in the *agr* function between the infection and commensal groups. Considering the impact of *agr* functionality on staphylococcal pathogenesis, the role of *agr* in *S. lugdunensis* infection still requires further investigation.

Our study has several limitations: first, the isolates in our study were mostly obtained from blood culture. No isolates from wound or abscess culture were included. Second, most commensal isolates were obtained from the skin flora of patients and no isolates collected from healthy volunteers were available for further comparison. Third, the infectious isolates or commensals were classified on the basis of clinical criteria. Fourth, the data were collected from a single hospital, and the number of community-associated *S. lugdunensis* isolates was small.

In conclusion, the two most common SCCmec types carried by *S. lugdunensis* were types V and II. PFGE typing revealed the presence of five main clones (pulsotypes A, J, M, N, and P) at our hospital. Compared with the infection group, the commensal group showed a higher frequency of multiple drug resistance. By contrast, the commensal group showed higher genetic diversity, as evident in PFGE typing. The infectious isolates more frequently carried SCCmec type V, and the commensal groups showed a higher frequency of SCCmec type II. No difference was observed in *agr* types and in the presence of  $\delta$ -hemolysin activity between the infection and commensal groups.

## Supporting Information

**S1 Table. Detailed information of 118 *S. lugdunensis* isolates**  
(DOCX)

## Acknowledgments

This work was supported by grants from Chang Gung Memorial Hospital (CMRPG3D1771) and the National Science Council of Republic of China (Taiwan) (NSC-101-2320-B-182A-002-MY3), Taiwan.

## Author Contributions

Conceived and designed the experiments: CFY TPL CWC JLL. Performed the experiments: CFY TPL SCC. Analyzed the data: CFY TPL MHL. Contributed reagents/materials/analysis tools: CFY TPL SCC JLL. Wrote the paper: CFY CWC JLL.

## References

1. Freney J, Brun Y, Bes M, Meugnier H, Grimont F, Grimont PA, et al. *Staphylococcus lugdunensis* sp. nov. and *Staphylococcus schleiferi* sp. nov., two species from human clinical specimens. *Int J Syst Bacteriol.* 1988; 38(2):168–172.
2. Choi SH, Chung JW, Lee EJ, Kim TH, Lee MS, Kang JM, et al. Incidence, characteristics, and outcomes of *Staphylococcus lugdunensis* bacteremia. *J Clin Microbiol.* 2010; 48(9):3346–3349. doi: [10.1128/JCM.00609-10](https://doi.org/10.1128/JCM.00609-10) PMID: [20592152](https://pubmed.ncbi.nlm.nih.gov/20592152/)

3. Shin JH, Jung HJ, Lee HR, Kim JH, Kim HR, Lee JN. Prevalence, identification, and antimicrobial susceptibility of *Staphylococcus lugdunensis* from various clinical specimens in Korea. *Jpn J Infect Dis*. 2007; 60(5):312. PMID: [17881876](#)
4. Vandenesch F, Etienne J, Reverdy ME, Eykyn SJ. Endocarditis due to *Staphylococcus lugdunensis*: report of 11 cases and review. *Clin Infect Dis*. 1993; 17(5):871–876. PMID: [8286628](#)
5. Frank KL, del Pozo JL, Patel R. From clinical microbiology to infection pathogenesis: how daring to be different works for *Staphylococcus lugdunensis*. *Clin Microbiol Rev*. 2008; 21(1):111–133. doi: [10.1128/CMR.00036-07](#) PMID: [18202439](#)
6. Hellbacher C, Tornqvist E, Soderquist B. *Staphylococcus lugdunensis*: clinical spectrum, antibiotic susceptibility, and phenotypic and genotypic patterns of 39 isolates. *Clin Microbiol Infect*. 2006; 12(1):43–49. PMID: [16460545](#)
7. Lin J-F, Cheng C-W, Kuo A-J, Liu T-P, Yang C-C, Huang C-T, et al. Clinical experience and microbiologic characteristics of invasive *Staphylococcus lugdunensis* infection in a tertiary center in northern Taiwan. *J Microbiol Immunol Infect*. 2014 Feb 13. pii: S1684-1182(14)00002-4. doi: [10.1016/j.jmii.2013.12.010](#)
8. Herchline T, Ayers LW. Occurrence of *Staphylococcus lugdunensis* in consecutive clinical cultures and relationship of isolation to infection. *J Clin Microbiol*. 1991; 29(3):419–421. PMID: [2037657](#)
9. Zinkemagel A, Zinkemagel M, Elzi M, Genoni M, Gubler J, Zbinden R, et al. Significance of *Staphylococcus lugdunensis* bacteremia: report of 28 cases and review of the literature. *Infection*. 2008; 36(4):314–321. doi: [10.1007/s15010-008-7287-9](#) PMID: [18648747](#)
10. Widerström M, Monsen T, Karlsson C, Wiström J. Molecular epidemiology of methicillin-resistant coagulase-negative staphylococci in a Swedish county hospital: evidence of intra- and interhospital clonal spread. *J Hosp Infect*. 2006; 64(2):177–183. PMID: [16911846](#)
11. Kleiner E, Monk AB, Archer GL, Forbes BA. Clinical significance of *Staphylococcus lugdunensis* isolated from routine cultures. *Clin Infect Dis*. 2010; 51(7):801–803. doi: [10.1086/656280](#) PMID: [20726772](#)
12. Wu A-B, Wang M-C, Tseng C-C, Lin W-H, Teng C-H, Huang A-H, et al. Clinical and microbiological characteristics of community-acquired *Staphylococcus lugdunensis* infections in Southern Taiwan. *J Clin Microbiol*. 2011; 49(8):3015–3018. doi: [10.1128/JCM.01138-11](#) PMID: [21697317](#)
13. Yen TY, Sung YJ, Lin HC, Peng CT, Tien N, Hwang KP, et al. Emergence of oxacillin-resistant *Staphylococcus lugdunensis* carrying staphylococcal cassette chromosome mec type V in central Taiwan. *J Microbiol Immunol Infect*. 2014 Dec 11. pii: S1684-1182(14)00249-7. doi: [10.1016/j.jmii.2014.11.018](#)
14. Jarraud S, Lyon GJ, Figueiredo AM, Lina G, Vandenesch F, Etienne J, et al. Exfoliatin-producing strains define a fourth agr specificity group in *Staphylococcus aureus*. *J Bacteriol*. 2000; 182(22):6517–6522. PMID: [11053400](#)
15. Dufour P, Jarraud S, Vandenesch F, Greenland T, Novick RP, Bes M, et al. High genetic variability of the agr locus in *Staphylococcus* species. *J Bacteriol*. 2002; 184(4):1180–1186. PMID: [11807079](#)
16. Jarraud S, Mougel C, Thioulouse J, Lina G, Meugnier H, Forey F, et al. Relationships between *Staphylococcus aureus* genetic background, virulence factors, agr groups (alleles), and human disease. *Infect Immun*. 2002; 70(2):631–641. PMID: [11796592](#)
17. Rautenberg M, Joo H-S, Otto M, Peschel A. Neutrophil responses to staphylococcal pathogens and commensals via the formyl peptide receptor 2 relates to phenol-soluble modulins release and virulence. *FASEB J*. 2011; 25(4):1254–1263. doi: [10.1096/fj.10-175208](#) PMID: [21183593](#)
18. Donvito B, Etienne J, Greenland T, Mouren C, Delorme V, Vandenesch F. Distribution of the synergistic haemolysin genes *hld* and *slush* with respect to agr in human staphylococci. *FEMS Microbiol Lett*. 1997; 151(2):139–144. PMID: [9228746](#)
19. Tseng S-P, Lin Y-T, Tsai J-C, Hung W-C, Chen H-J, Chen P-F, et al. Genotypes and phenotypes of *Staphylococcus lugdunensis* isolates recovered from bacteremia. *J Microbiol Immunol Infect*. 2013 Dec 31. pii: S1684-1182(13)00229-6. doi: [10.1016/j.jmii.2013.11.006](#)
20. Liu C, Shen D, Guo J, Wang K, Wang H, Yan Z, et al. Clinical and microbiological characterization of *Staphylococcus lugdunensis* isolates obtained from clinical specimens in a hospital in China. *BMC Microbiol*. 2012; 12(1): 168.
21. Souvenir D, Anderson DE, Palpant S, Mroch H, Askin S, Anderson J, et al. Blood cultures positive for coagulase-negative staphylococci: antisepsis, pseudobacteremia, and therapy of patients. *J Clin Microbiol*. 1998; 36(7): 1923–1926. PMID: [9650937](#)
22. Fadel HJ, Patel R, Vetter EA, Baddour LM. Clinical significance of a single *Staphylococcus lugdunensis*-positive blood culture. *J Clin Microbiol*. 2011; 49(4):1697–1699. doi: [10.1128/JCM.02058-10](#) PMID: [21270222](#)
23. Morrison MA, Hageman JC, Klevens RM. Case definition for community-associated methicillin-resistant *Staphylococcus aureus*. *J Hosp Infect*. 2006; 62(2):241.

24. Noguchi N, Goto K, Ro T, Narui K, Ko M, Nasu Y, et al. Using the tannase gene to rapidly and simply identify *Staphylococcus lugdunensis*. *Diagn Microbiol Infect Dis*. 2010; 66(1):120–123. doi: [10.1016/j.diagmicrobio.2009.03.028](https://doi.org/10.1016/j.diagmicrobio.2009.03.028) PMID: [19446981](https://pubmed.ncbi.nlm.nih.gov/19446981/)
25. Szabados F, Woloszyn J, Richter C, Kaase M, Gatermann S. Identification of molecularly defined *Staphylococcus aureus* strains using matrix-assisted laser desorption/ionization time of flight mass spectrometry and the Biotyper 2.0 database. *J Med Microbiol*. 2010; 59(7):787–790.
26. Clinical and Laboratory Standards Institute. Performance standards for antimicrobial susceptibility testing; twenty-second informational supplement (CLSI Document M100-S22. 2012). Wayne, PA: Clinical and Laboratory Standards Institute; 2012
27. Kondo Y, Ito T, Ma XX, Watanabe S, Kreiswirth BN, Etienne J, et al. Combination of multiplex PCRs for staphylococcal cassette chromosome mec type assignment: rapid identification system for *mec*, *ccr*, and major differences in junkyard regions. *Antimicrob Agents Chemother*. 2007; 51(1):264–274. PMID: [17043114](https://pubmed.ncbi.nlm.nih.gov/17043114/)
28. McDougal LK, Steward CD, Killgore GE, Chaitram JM, McAllister SK, Tenover FC. Pulsed-field gel electrophoresis typing of oxacillin-resistant *Staphylococcus aureus* isolates from the United States: establishing a national database. *J Clin Microbiol*. 2003; 41(11):5113–5120. PMID: [14605147](https://pubmed.ncbi.nlm.nih.gov/14605147/)
29. Mediavilla JR, Chen L, Mathema B, Kreiswirth BN. Global epidemiology of community-associated methicillin resistant *Staphylococcus aureus* (CA-MRSA). *Curr Opin Microbiol*. 2012; 15(5):588–595. doi: [10.1016/j.mib.2012.08.003](https://doi.org/10.1016/j.mib.2012.08.003) PMID: [23044073](https://pubmed.ncbi.nlm.nih.gov/23044073/)
30. Kaito C, Saito Y, Nagano G, Ikuo M, Omae Y, Hanada Y, et al. Transcription and translation products of the cytolyisin gene *psm-mec* on the mobile genetic element SCCmec regulate *Staphylococcus aureus* virulence. *PLoS Path*. 2011; 7(2):e1001267.
31. Kaito C, Omae Y, Matsumoto Y, Nagata M, Yamaguchi H, Aoto T, et al. A novel gene, *fudoh*, in the SCCmec region suppresses the colony spreading ability and virulence of *Staphylococcus aureus*. *PLoS One*. 2008; 3(12):e3921. doi: [10.1371/journal.pone.0003921](https://doi.org/10.1371/journal.pone.0003921) PMID: [19079549](https://pubmed.ncbi.nlm.nih.gov/19079549/)
32. Gonzalez BE, Rueda AM, Shelburne SA III, Musher DM, Hamill RJ, Hultén KG. Community-associated strains of methicillin-resistant *Staphylococcus aureus* as the cause of healthcare-associated infection. *Infect Control Hosp Epidemiol*. 2006; 27(10):1051–1056. PMID: [17006811](https://pubmed.ncbi.nlm.nih.gov/17006811/)
33. Brennan GI, Shore AC, Corcoran S, Tecklenborg S, Coleman DC, O'Connell B. Emergence of hospital- and community-associated panton-valentine leukocidin-positive methicillin-resistant *Staphylococcus aureus* genotype ST772-MRSA-V in Ireland and detailed investigation of an ST772-MRSA-V cluster in a neonatal intensive care unit. *J Clin Microbiol*. 2012; 50(3):841–847. doi: [10.1128/JCM.06354-11](https://doi.org/10.1128/JCM.06354-11) PMID: [22189119](https://pubmed.ncbi.nlm.nih.gov/22189119/)
34. Seybold U, Kourbatova EV, Johnson JG, Halvosa SJ, Wang YF, King MD, et al. Emergence of community-associated methicillin-resistant *Staphylococcus aureus* USA300 genotype as a major cause of health care—associated blood stream infections. *Clin Infect Dis*. 2006; 42(5):647–656. PMID: [16447110](https://pubmed.ncbi.nlm.nih.gov/16447110/)
35. David M, Kearns A, Gossain S, Ganner M, Holmes A. Community-associated methicillin-resistant *Staphylococcus aureus*: nosocomial transmission in a neonatal unit. *J Hosp Infect*. 2006; 64(3):244–250. PMID: [16928408](https://pubmed.ncbi.nlm.nih.gov/16928408/)
36. Hebert G. Hemolysins and other characteristics that help differentiate and biotype *Staphylococcus lugdunensis* and *Staphylococcus schleiferi*. *J Clin Microbiol*. 1990; 28(11): 2425–2431. PMID: [2254418](https://pubmed.ncbi.nlm.nih.gov/2254418/)
37. Donvito B, Etienne J, Denoroy L, Greenland T, Benito Y, Vandenesch F. Synergistic hemolytic activity of *Staphylococcus lugdunensis* is mediated by three peptides encoded by a non-*agr* genetic locus. *Infect Immun*. 1997; 65(1):95–100. PMID: [8975897](https://pubmed.ncbi.nlm.nih.gov/8975897/)
38. Schwan WR, Langhorne MH, Ritchie HD, Stover CK. Loss of hemolysin expression in *Staphylococcus aureus agr* mutants correlates with selective survival during mixed infections in murine abscesses and wounds. *FEMS Immunol Med Microbiol*. 2003; 38(1):23–28. PMID: [12900051](https://pubmed.ncbi.nlm.nih.gov/12900051/)
39. Fowler VG, Sakoulas G, McIntyre LM, Meka VG, Arbeit RD, Cabell CH, et al. Persistent bacteremia due to methicillin-resistant *Staphylococcus aureus* infection is associated with *agr* dysfunction and low-level in vitro resistance to thrombin-induced platelet microbicidal protein. *J Infect Dis*. 2004; 190(6):1140–1149. PMID: [15319865](https://pubmed.ncbi.nlm.nih.gov/15319865/)
40. Schweizer ML, Furuno JP, Sakoulas G, Johnson JK, Harris AD, Shardell MD, et al. Increased mortality with accessory gene regulator (*agr*) dysfunction in *Staphylococcus aureus* among bacteremic patients. *Antimicrob Agents Chemother*. 2011; 55(3):1082–1087. doi: [10.1128/AAC.00918-10](https://doi.org/10.1128/AAC.00918-10) PMID: [21173172](https://pubmed.ncbi.nlm.nih.gov/21173172/)
